# Supplementary material for: Schottky barrier and surface plasmonic resonance phenomena towards the photocatalytic reaction: study of their mechanisms to enhance photocatalytic activity
Source: Royal Society of Chemistry journal article supplement (doi:10.1039/c4cy01545b), 2015-01-01
Supplement: c4cy01545b1.pdf [file c4cy01545b1.pdf]

Table 1 : Mechanism of SPR and schottky barrier of recent studies

| Metal/ Semiconductor                                                          | Light source                              | Mechanism                                                                                                                                                                                                                                                                           |
|-------------------------------------------------------------------------------|-------------------------------------------|-------------------------------------------------------------------------------------------------------------------------------------------------------------------------------------------------------------------------------------------------------------------------------------|
| <sup>8</sup> (Pd, Ru, Co, Ni, Fe, Cr)/Bi <sub>2</sub> O <sub>3</sub>          | visible                                   | Schottky barrier, leading to an effective charge separation because of the enhanced internal electric field, metal ions behave as microcathodes                                                                                                                                     |
| <sup>17</sup> Pt–TiO <sub>2</sub> , Au–TiO <sub>2</sub> , Pd–TiO <sub>2</sub> | UV, λ ~254 nm                             | Schottky barrier, charge transfer from semiconductor to metal                                                                                                                                                                                                                       |
| <sup>64</sup> Cu(I)/TiO <sub>2-x</sub>                                        | Infrared                                  | Schottky barrier, Electron supply and partial regeneration of surface oxygen vacancy induced by irradiation                                                                                                                                                                         |
| <sup>39</sup> (Rh, Pt, Ru, Ir, Au, Cu or Ni)/TiO <sub>2</sub>                 | UV, λ ~254 nm                             | Schottky barrier, an efficient electron trap preventing photogenerated electron-hole recombination, which enhances the efficiency of photocatalytic reaction                                                                                                                        |
| <sup>63</sup> CdS–Au–TiO <sub>2</sub><br>Sandwich Structure                   | Solar spectrum, visible<br>, λ:525–725 nm | Plasmonic hot electron transfer and back transfer                                                                                                                                                                                                                                   |
| <sup>61</sup> Au NR/TiO <sub>2</sub>                                          | Visible, λ:508- 610 nm                    | Schottky junction is established at the interface between the Au NRs and TiO <sub>2</sub> resulting in charge transfer from the TiO <sub>2</sub> to the Au NRs, Illuminating the AuNRs with visible light excited surface plasmons that rapidly decay, producing many hot electrons |
| <sup>62</sup> AuNRs/TiO <sub>2</sub>                                          | Near-infrared,<br>λ:1000 nm               | Plasmon-induced charge excitation, multiple electron holes generated                                                                                                                                                                                                                |
| <sup>33</sup> (CdS@SiO <sub>2</sub> //Au@SiO <sub>2</sub> )                   | Visible, λ> 350 nm                        | Localized surface plasmon resonance, locally enhanced electricfield enhance the photoexcitation                                                                                                                                                                                     |
| <sup>59</sup> Au/CeO <sub>2</sub>                                             | Visible, λ>400nm                          | Surface plasmon resonance                                                                                                                                                                                                                                                           |
| <sup>38</sup> Au particles on<br>FTO/WO <sub>3</sub> /BiVO <sub>4</sub>       | Visible, λ:560 nm                         | Photoinduced charge separation in a photocatalytic system, without undergoing a plasmon resonance effect                                                                                                                                                                            |
| <sup>30</sup> Au/TiO <sub>2</sub>                                             | near-UV, 300< λ> 400 nm                   | Employs the enhanced electric field amplitude on the surface of Ag NPs in the spectral vicinity of their plasmon resonances                                                                                                                                                         |
| <sup>60</sup> Au–ZnO photoelectrode                                           | Visible, λ:530 nm                         | Localized plasmon-induced effects and charge separation in photoelectrochemical processes, coupling of hot electrons that are formed by plasmons and the electromagnetic field can effectively increase the probability of a photochemical reaction                                 |
